# Supplementary material for: Transgene expression in mice of the Opa1 mitochondrial transmembrane protein through bicontinuous cubic lipoplexes containing gemini imidazolium surfactants
Source: PubMed Central journal article supplement (PMC8684174; doi:10.1186/s12951-021-01167-x), 2021-12-18
Supplement: 12951_2021_1167_MOESM1_ESM.pdf [file 12951_2021_1167_MOESM1_ESM.pdf]

## **SUPPORTING MATERIAL**

### **Transgene expression in mice of the Opa1 mitochondrial transmembrane protein through bicontinuous cubic lipoplexes containing gemini imidazolium surfactants**

Mónica Muñoz-Úbeda<sup>1,2,\*</sup>, Martina Semenzato<sup>3</sup>, Anais Franco-Romero<sup>3</sup>, Elena Junquera<sup>2</sup>, Emilio Aicart<sup>2</sup>, Luca Scorrano<sup>3</sup> and Iván López-Montero<sup>1,2,\*</sup>.

*1 Instituto de Investigación Biomédica Hospital 12 de Octubre (imas12), Madrid, Spain*

*2 Dpto. Química Física, Universidad Complutense de Madrid, Spain.*

*3 Fondazione per la Ricerca Biomédica Avanzata, Venetian Institute of Molecular Medicine (VIMM), Padova, Italy.*

Corresponding author: [monicamubeda@quim.ucm.es](mailto:monicamubeda@quim.ucm.es), [ivanlopez@quim.ucm.es](mailto:ivanlopez@quim.ucm.es)

**Determination of the effective charge of the gemini cationic lipid and the MSCV-OPA1 plasmid.** The composition of the mixed lipid acting as cationic gene vector is given in terms of its molar fraction ( $\alpha$ ) of the cationic lipid in the total lipid, while in the lipoplex, the composition may be expressed by: a) the total lipid to DNA mass ratio, defined as  $(m_L/m_D = (m_{L^+} + m_{L^0})/m_D)$ , where  $m_L$ ,  $m_{L^+}$ ,  $m_{L^0}$  and  $m_D$  are the masses of the total mixed lipid,  $(C_{16}Im)_2(C_4O)$ , DOPE, DSPE-PEG and DNA, respectively, or b) the effective charge ratio ( $\rho_{\text{eff}}$ ) expressed as the ratio between the charges of positive  $(C_{16}Im)_2(C_4O)$  mixed lipid and negative DNA phosphate groups. All these quantities are related by the following two equations:

$$\alpha = \frac{m_{L^+} / M_{L^+}}{(m_{L^+} / M_{L^+}) + (m_{L^0} / M_{L^0})} \quad (1)$$

$$\rho_{\text{eff}} = \frac{n^+}{n^-} = \frac{q_{\text{eff},L^+}^+ (m_{L^+} / M_{L^+})}{q_{\text{eff},D}^- (m_D / M_D)} \quad (2)$$

where  $n^+$  and  $n^-$  are the number of moles of positive and negative charges of  $(C_{16}Im)_2(C_4O)$  and DNA respectively;  $(q_{\text{eff},L^+}^+)$  and  $(q_{\text{eff},D}^-)$  are the effective charges of  $(C_{16}Im)_2(C_4O)$  and plasmid DNA (pDNA, MSCV-OPA1 in our case) per bp; and  $M_{L^0}$ ,  $M_{L^+}$  and  $M_D$  are the molecular weight of the DOPE,  $(C_{16}Im)_2(C_4O)$  and MSCV-OPA1 per bp, respectively.

The electroneutrality ratio of the lipoplex  $((m_{L^+} + m_{L^0}) / m_D)_\phi$  is reached for a particular formulation at which the positive charges of the mixed lipid and those negative of DNA balance ( $\rho_{\text{eff}} = 1$ ). Values of  $\rho_{\text{eff}}$  higher than the electroneutrality ratio are required for lipoplexes to become a potentially cell transfecting agent as the positively charged lipoplexes allow them crossing the negatively charged cell membranes.<sup>1</sup> The electroneutrality ratio can be accurately determined by measuring the zeta potential ( $\zeta$ ) of lipoplexes as a function of  $(m_L/m_D)$  (see **Figure 1A**). A sign inversion on the charge in the ( $\zeta$ ) sigmoidal plots occurs at  $(m_L/m_D)_\phi$  and this value is related to  $\alpha$  through the equations (1-2) by:

$$\left( \frac{m_L}{m_D} \right)_\phi = \left( \frac{m_{L^+} + m_{L^0}}{m_D} \right)_\phi = \frac{q_D^- [\alpha M_{L^+} + (1-\alpha) M_{L^0}]}{q_L^+ \alpha M_D} \quad (3)$$

In general, linear DNAs, such as calf thymus DNA (ctDNA), have its negative charge totally available for the cationic lipid, i.e.,  $q_{\text{linear D}} = -2$  per base pair. However, plasmid DNA remains in a supercoiled conformation<sup>2-7</sup> rendering a much less negative charge than its nominal one ( $q_{\text{eff},D}^- \ll -2/bp$ ). The determination of the effective charge of both, the cationic lipid ( $q_{\text{eff},L^+}^+$ ) and the pDNA ( $q_{\text{eff},D}^-$ ) is required then to quantitatively formulate lipoplexes with different effective charge ratios ( $\rho_{\text{eff}}$ ). For that, the effective charge of the  $(C_{16}Im)_2(C_4O)$  ( $q_{\text{eff},L^+}^+$ ) was first determined using equation (3) and the experimental value of  $(m_L/m_D)_\phi$  measured from zeta potential (**Figure S2**), and assuming  $q_{\text{linear D}} = -2/bp$ . The effective charge of MSCV-OPA1 ( $q_{\text{eff},D}^-$ ) is then obtained with equation (4) using the effective charge of the  $(C_{16}Im)_2(C_4O)$  ( $q_{\text{eff},L^+}^+$ ) and the experimental electroneutrality value  $(m_L/m_D)_\phi$  for the  $(C_{16}Im)_2(C_4O)/DOPE/DSPE-PEG$  lipoplex containing MSCV-OPA1 plasmid DNA (**Figure 1**):

$$q_{\text{eff},D}^- = \left( \frac{m_L}{m_D} \right)_\Phi \left( \frac{q_{L^+}^+ \alpha M_D}{\alpha M_{L^+} + (1-\alpha)M_{L^0}} \right) \quad (4)$$

The effective charge ratio ( $\rho_{\text{eff}}$ ) of the lipoplex at  $\alpha = 0.2$  is obtained by substituting ( $q_{\text{eff},L^+}^+$ ) and the MSCV-OPA1 ( $q_{\text{eff},D}^-$ ) in equation (2).

## REFERENCES

- (1) Dias, R. S.; Lindman, B. DNA Interaction with Polymers and Surfactants; *Wiley & Sons: Hoboken, NJ* **2008**.
- (2) Muñoz-Úbeda, M.; Misra, S. K.; Barrán-Berdón, A. L.; Aicart-Ramos, C.; Sierra, M. B.; Biswas, J.; Kondaiah, P.; Junquera, E.; Bhattacharya, S.; Aicart, E. Why is less cationic lipid required to prepare lipoplexes from plasmid DNA than linear DNA in gene therapy? *J. Am. Chem. Soc.* **2011**, *133*, 18014-18017.
- (3) Barrán-Berdón, A. L.; Misra, S. K.; Datta, S.; Muñoz-Úbeda, M.; Kondaiah, P.; Junquera, E.; Bhattacharya, S.; Aicart, E. Cationic gemini lipids containing polyoxyethylene spacers as improved transfecting agents of plasmid DNA in cancer cells. *J. Mater. Chem. B* **2014**, *2*, 4640-4652.
- (4) Martínez-Negro, M.; Guerrero-Martínez, A.; García-Río, L.; Domenech, O.; Aicart, E.; de Ilarduya, C. T.; Junquera, E. Multidisciplinary approach to the transfection of plasmid DNA by a nonviral nanocarrier based on a gemini-bolaamphiphilic hybrid lipid. *ACS Omega* **2018**, *3*, 208-217.
- (5) Misra, S. K.; Muñoz-Úbeda, M.; Datta, S.; Barrán-Berdón, A. L.; Aicart-Ramos, C.; Castro-Hartmann, P.; Kondaiah, P.; Junquera, E.; Bhattacharya, S.; Aicart, E. Effects of a delocalizable cation on the headgroup of gemini lipids on the lipoplex-type nano-aggregates directly formed from plasmid DNA. *Biomacromolecules* **2013**, *14*, 3951-3963.
- (6) Lyubchenko, Y. L.; Shlyakhtenko, L. S. Visualization of supercoiled DNA with atomic force microscopy in situ. *Proc. Natl. Acad. Sci. USA* **1997**, *94*, 496-501.
- (7) Foldvari, M.; Badea, I.; Wettig, S.; Verrall, R.; Bagonluri, M. Structural characterization of novel gemini non-viral DNA delivery systems for cutaneous gene therapy. *J. Exp. Nanosci.* **2006**, *1*, 165-176.

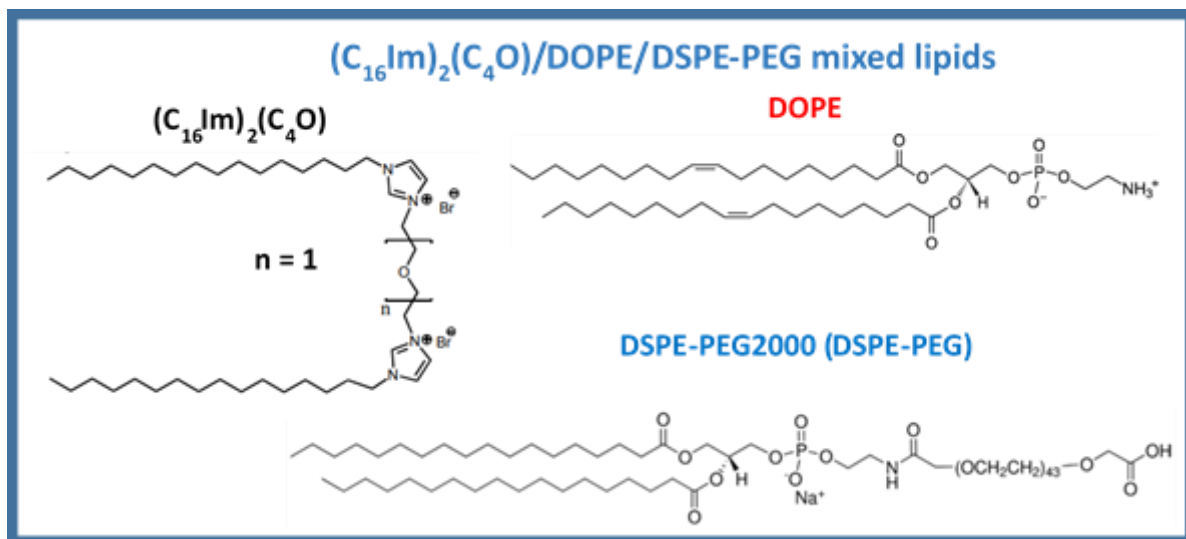

**Scheme S1:** Structures of  $(C_{16}Im)_2(C_4O)$  gemini cationic lipid, the zwitterionic phospholipid DOPE and the polyethylene-glycol DSPE-PEG2000 (DSPE-PEG).

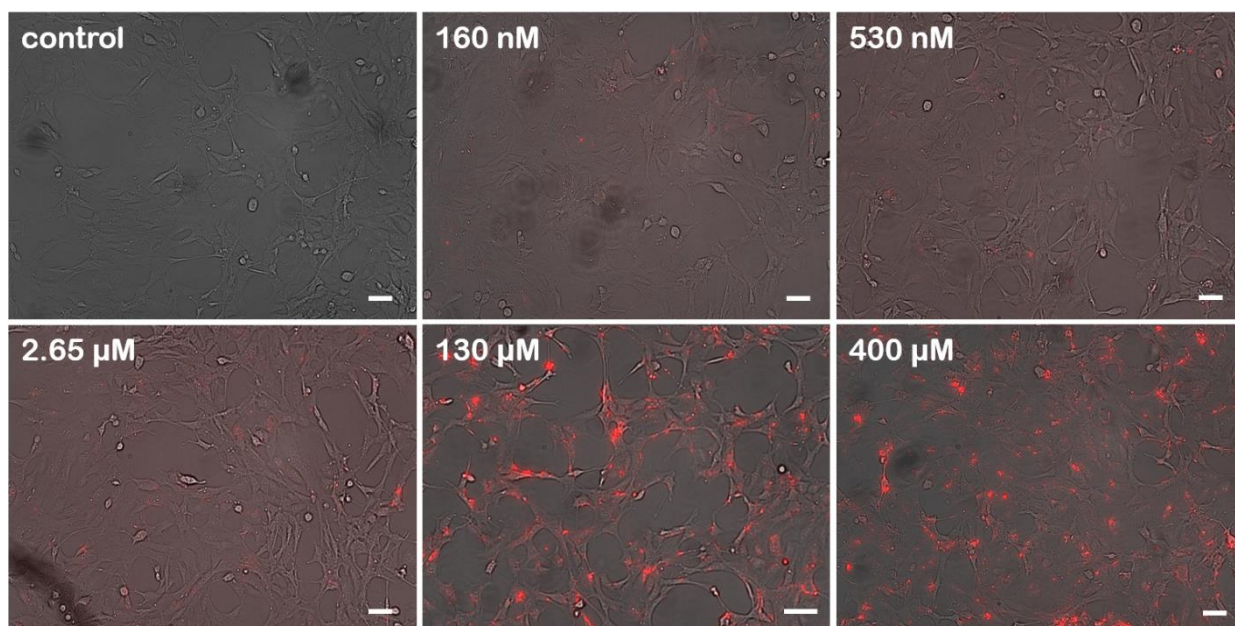

**Figure S1.** Uptake of  $(C_{16}Im)_2(C_4O)/DOPE/DSPE-PEG/OPA1$  lipoplexes labeled with the fluorescent dye DiR' (red channel) into MEFs wt after 24 h incubation and at different concentration. Scale bars are 20  $\mu m$ .

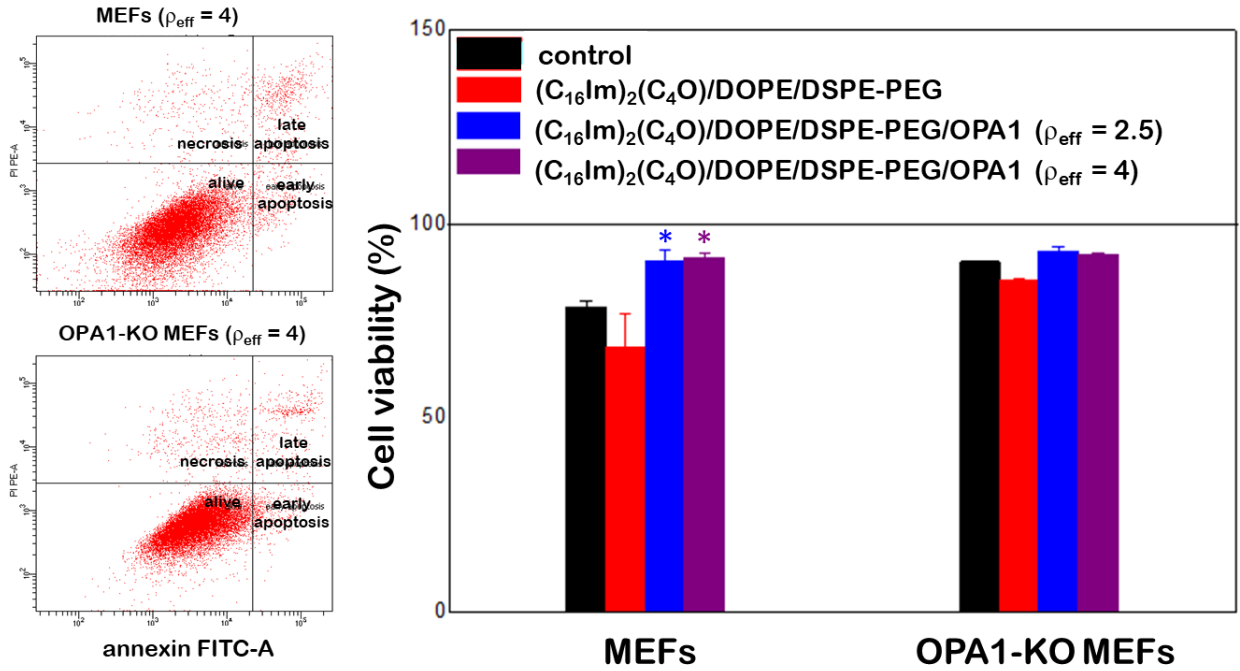

**Figure S2.** Apoptosis after 24h of treatment was measured by flow cytometry through Annexin V-FITC and PI staining. Representative plots for MEFs wt ( $\rho_{\text{eff}} = 4$ ) and OPA1-KO MEFs ( $\rho_{\text{eff}} = 4$ ) are shown in the left panel. The percentage of alive cells is indicated in the right panel. The data are presented as the means  $\pm$  the SD from three separate experiments (\*  $p < 0.05$ ).

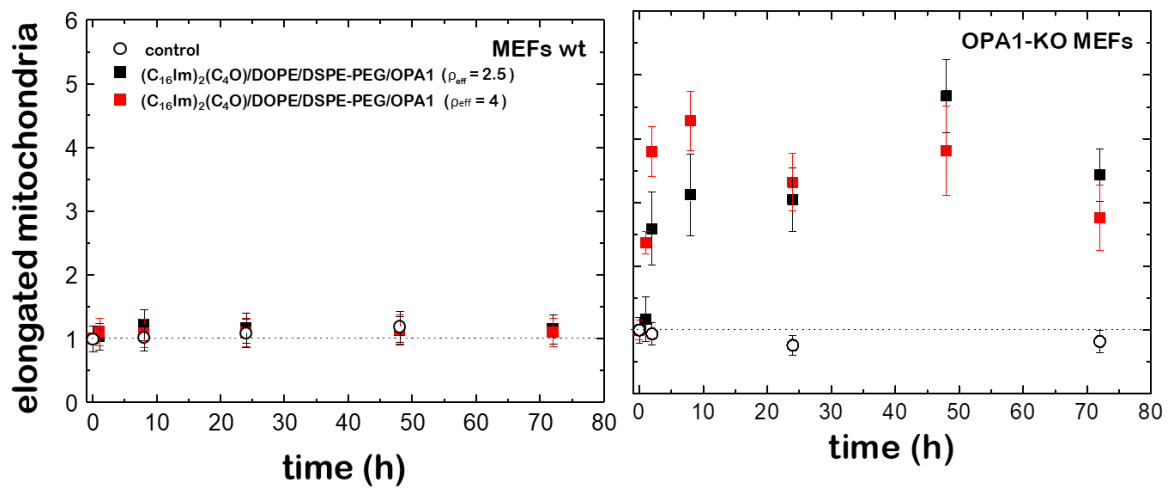

**Figure S3.** Time evolution of the elongated mitochondria ratio with respect to initial elongated mitochondria for MEFs wt (left panel) and OPA1-KO MEFs (right panel) after transfection with  $(C_{16}Im)_2(C_4O)/DOPE/DSPE-PEG/OPA1$  lipoplexes at  $\rho_{eff} = 2.5$  (black squares) and 4 (red squares). As a control, the mitochondrial phenotype was also imaged in the absence of treatment (hollow symbols). See Methods section for details. Student's t-test was performed to measure the significance of statistical difference between the different groups and the negative control (in the absence of treatment).  $p < 0.05$  was considered statistically significant.

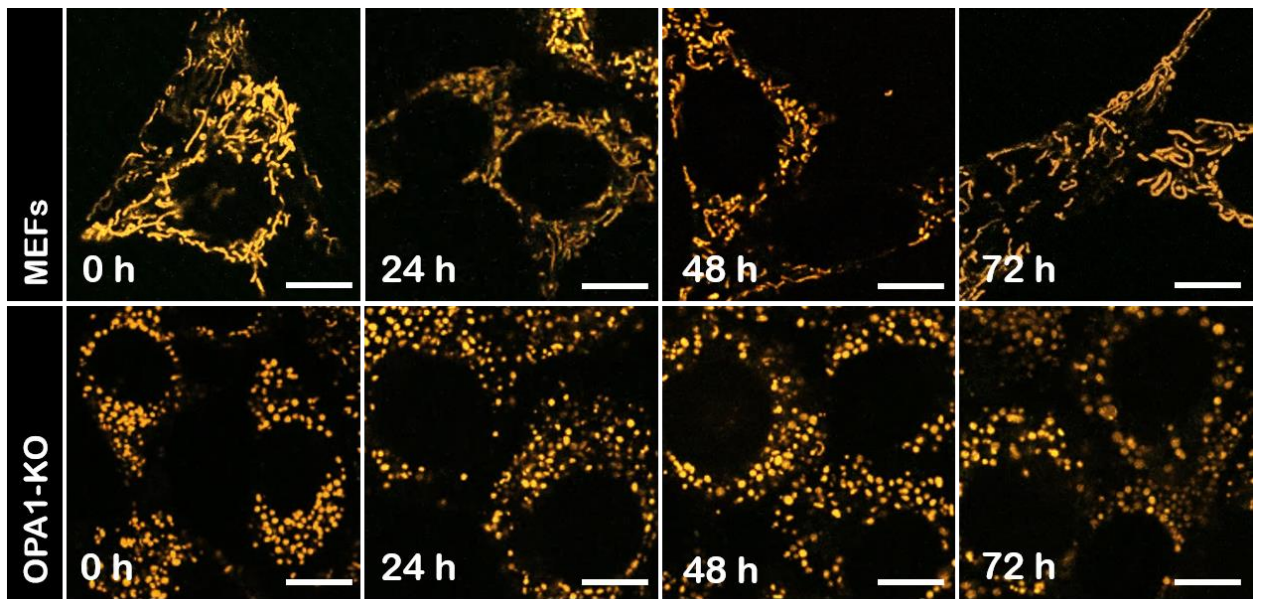

**FIGURE S4.** Confocal fluorescence microscopy images MEFs wt (upper row) and OPA1-KO MEFs (lower row) at different time intervals in the absence of treatment. The mitochondrial network was labeled with TMRM (1  $\mu$ M). Scale bars are 10  $\mu$ m.

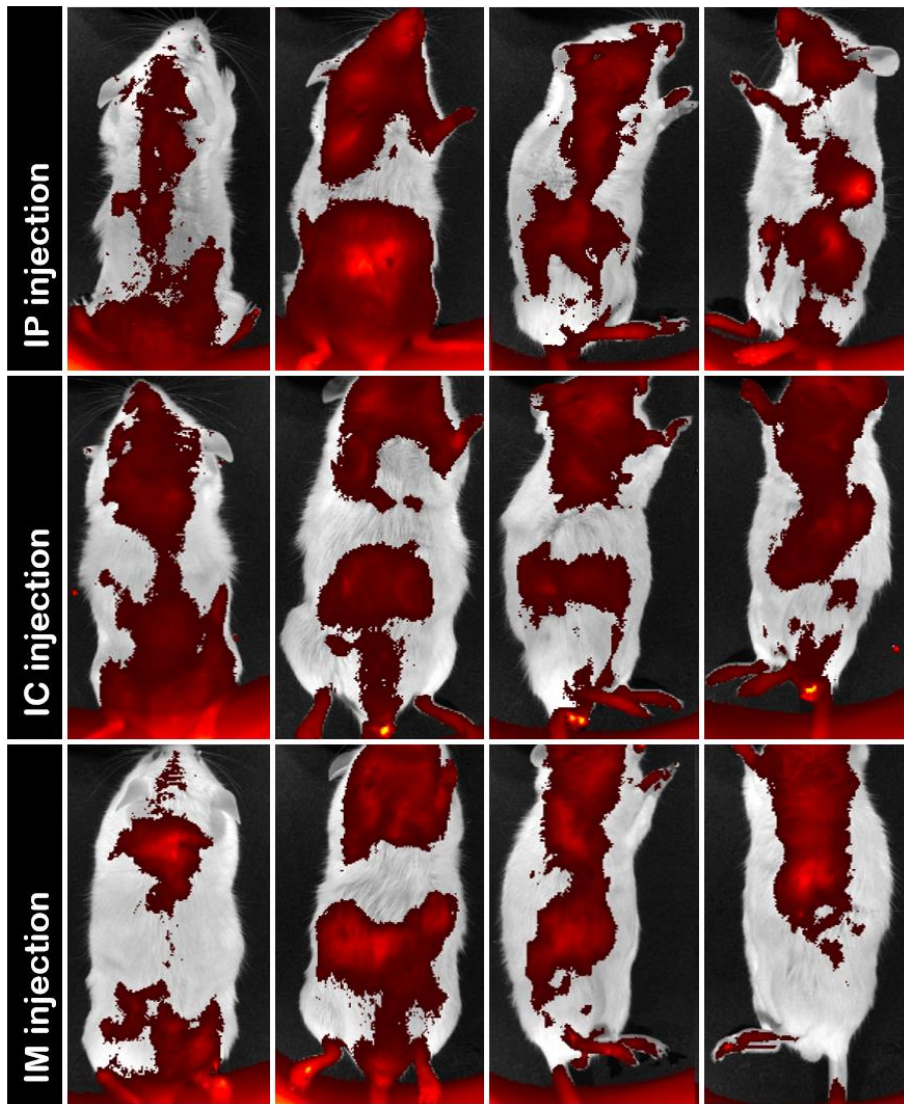

**Figure S5.** *In vivo* biodistribution of DiR'-labeled  $(C_{16}Im)_2(C_4O)/DOPE/DSPE-PEG/OPA1$  lipoplexes in CD-1 mice after 4 weeks with treatment via intraperitoneal (IP), intracardiac (IC) and intramuscular (IM) administration.



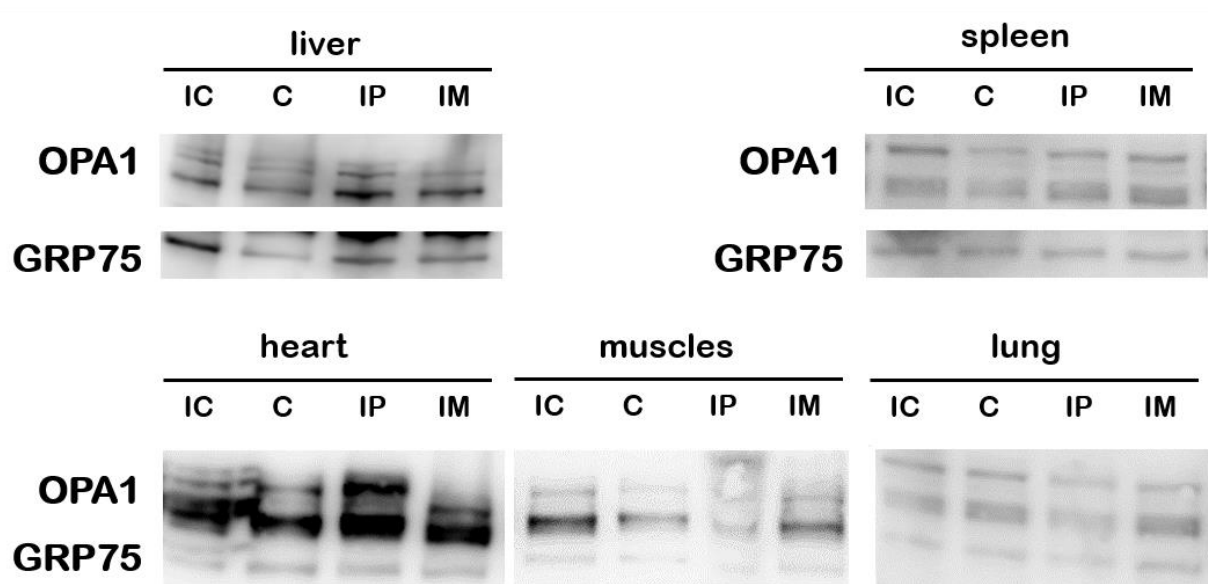

**Figure S6.** Western blot of Opa1 and GRP75 protein levels in liver, spleen, heart, muscles and lung from CD-1 mice after 48 h of transfection with  $(C_{16}Im)_2(C_4O)/DOPE/DSPE-PEG/OPA1$  lipoplexes ( $\rho_{eff} = 4$ ). Different lanes correspond to the groups without treatment (C) and with treatment via intraperitoneal (IP), intracardiac (IC) and intramuscular (IM) administration.
